# Supplementary material for: A ZIF-8-encapsulated interpenetrated hydrogel/nanofiber composite patch for chronic wound treatment
Source: Royal Society of Chemistry journal article supplement (doi:10.1039/d3tb02683c), 2024-01-01
Supplement: d3tb02683c1.pdf [file d3tb02683c1.pdf]

## Supporting Information

### ZIF-8-encapsulated Interpenetrated Hydrogel/nanofiber Composite Patch for Chronic Wound Treatment

Hongju Cheng,<sup>a</sup> Md All Amin Newton,<sup>a</sup> Rajib Mia,<sup>a</sup> Qinchen Zhang,<sup>a</sup> Weihong Gao,<sup>a</sup> Zan Lu,<sup>a</sup>

Yuansheng Zheng,<sup>a</sup> Zijian Dai<sup>\*b</sup> and Jie Zhu<sup>\*a</sup>

<sup>a</sup>School of Textiles and Fashion, Shanghai University of Engineering Science, Shanghai  
201620, China

<sup>b</sup>Innovation Center for Textile Science and Technology, Donghua University, Shanghai  
200051, China

Correspondence: zj910205@126.com; zjdai@dhu.edu.cn

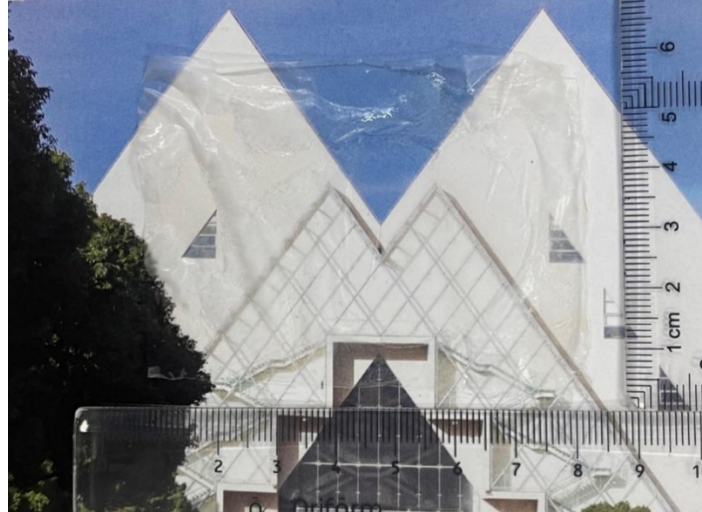

**Fig. S1** The optical image of a large hydrogel patch with a size of 8 x 6 cm.

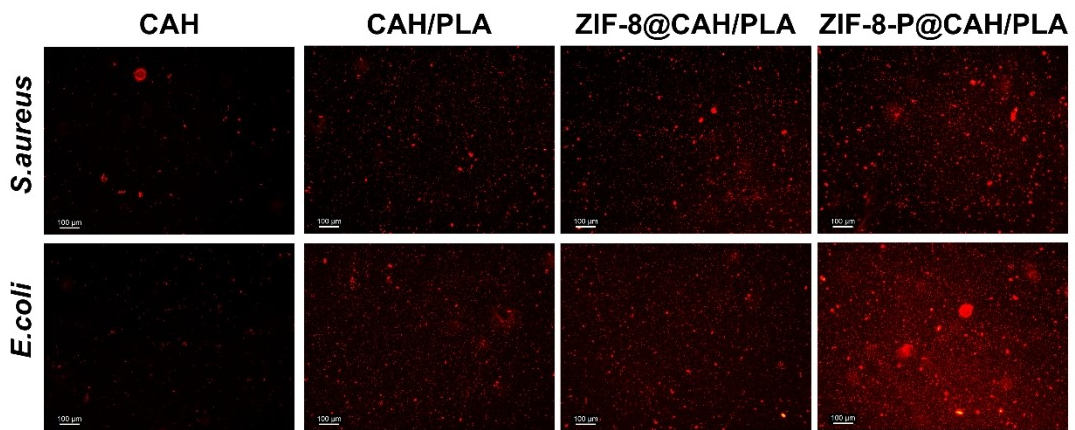

**Fig. S2** Fluorescent staining of *E. coli* and *S. aureus*. The scale bar is 100  $\mu\text{m}$ .

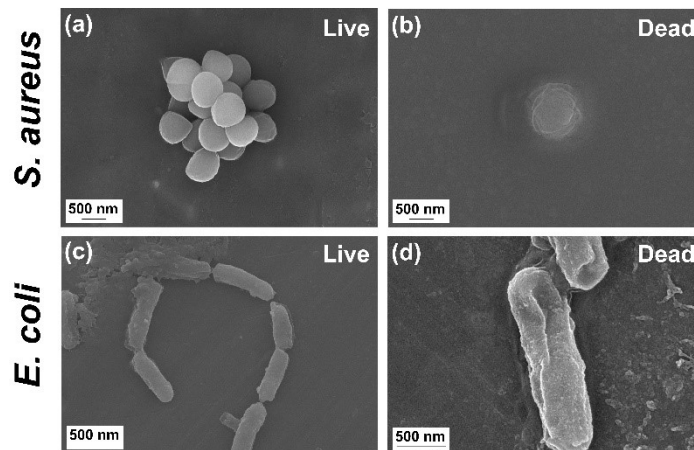

Fig. S3. SEM images of *E. coli* and *S. aureus* bacteria before and after co-culture with ZIF-8@CAH/PLANF.

**Table S1** Comparison of antibacterial effect.

| Name                                               | Bacterial type                     | Antibacterial effect | Reference                                              |
|----------------------------------------------------|------------------------------------|----------------------|--------------------------------------------------------|
| Essential oil-supported electrospinning fiber film | <i>E. coli</i><br><i>S. aureus</i> | >98%<br>(24 h)       | <i>Sep. Purif. Technol.</i> <b>2023</b> , 327          |
| PPCL@PDA/TAEG/PCL/ZIF-8                            | <i>E. coli</i><br><i>S. aureus</i> | >95%<br>(60 min)     | <i>Chem. Engineer J.</i> <b>2021</b> , 422, 130007     |
| MOF/ polyurethane composite nanofiber membrane     | <i>E. coli</i><br><i>S. aureus</i> | 96%<br>(24 h)        | <i>ACS Appl. Mater. Interfaces</i> <b>2023</b> , 15, 6 |
| Photocatalytic ZIF-8 composite patch               | <i>E. coli</i><br><i>S. aureus</i> | >99.93%<br>(24 h)    | This work                                              |
